# Supplementary material for: Perceived Causal Networks in Patients with Fibromyalgia and Depression: Construction of a Structured Interview and Testing Reliability
Source: Research Square preprint supplement (doi:10.21203/rs.3.rs-6352353/v1), 2025-05-13
Supplement: Supplementary file 1 [file 912e1dc6899b764474c08671.pdf]

## **Supplementary Online Resources**

Section A: Survey Methodology

Table S1 Demographic characteristics of the respondents

Table S2: Final Symptom list ordered by the Symptom Importance Factor

Table S3 Symptom list development

Section B: List of used R-Packages

Section C: Definition of the final categories for qualitative differences of the edges

Table S4: Participant ratings of network usability and comprehensibility

Table S5: Average participant evaluation of the unedited and the edited network.

Section D: Statements about which connections became clearer to participants

Section E: Statements on which other positive or negative interview effects

Reference list Online Resource

## Section A: Expert and Patient Survey Methodology

Experts were invited via institutional mailing lists and personal contact. Inclusion criterion was clinical or research experience with  $\geq 100$  patients with FMS or MDD as a licensed psychologist or physician. The expert survey for FMS was conducted online using SoSci-Survey (SoSci Survey GmbH, 2020) and the expert rating for MDD was conducted in person in our inpatient and outpatient clinics. Experts were asked to rate the relevance and completeness of the current symptom list.

Patients were recruited via flyers and social media. Inclusion criteria were self-reported diagnosis of FMS or MDD and age  $\geq 18$ . The patient survey for FMS was conducted online using RedCap (Harris et al., 2009) and the patient survey for MDD was conducted in person in our inpatient and outpatient clinics. Surveys included the current symptom list and a prompt to suggest missing symptoms.

Demographic characteristics of the respondents are summarized below

**Table S1 Demographic characteristics of patients and experts**

| Survey      | N  | Age (M, SD)        | Female (%) | Number of treated patients (M, SD) | Number of patients included in clinical study (M, SD) |
|-------------|----|--------------------|------------|------------------------------------|-------------------------------------------------------|
| FMS expert  | 14 | 51.14 (SD=13.88)   | 57%        | 141.07 (SD = 117.02)               | 278.57 (SD = 279.97)                                  |
| FMS patient | 75 | 51.79 (SD = 10.51) | 97%        |                                    |                                                       |
| MDD expert  | 10 | 50.56 (SD = 10.88) | 50%        | 221.67 (SD = 215.61)               | 160 (136.6)                                           |
| MDD patient | 20 | 45.85 (SD = 16.37) | 70%        |                                    |                                                       |

*Table S1: Demographic characteristics of respondents of the two expert and patient surveys. M = mean, SD = standard deviation.*

**Table S2: Final Symptom list ordered by the Symptom Importance Factor (SIF)**

| <b>Label</b>                      | <b>Item</b>                                                                                                                                                                             | <b>Nb<br/>r.</b> | <b>Selected</b>          | <b>SIF</b>                              |
|-----------------------------------|-----------------------------------------------------------------------------------------------------------------------------------------------------------------------------------------|------------------|--------------------------|-----------------------------------------|
| Fatigue                           | I have felt tired or exhausted.                                                                                                                                                         | 21               | 97 (MDD: 48;<br>FMS: 49) | 0.72<br>(MDD:<br>0.7; FMS:<br>0.74)     |
| Sleep problems                    | I have had trouble falling or staying asleep, have woken up earlier than desired (early morning awakening), or have felt that my sleep was non-restorative despite sufficient duration. | 23               | 92 (MDD: 46;<br>FMS: 46) | 0.64<br>(MDD:<br>0.6; FMS:<br>0.69)     |
| Pain                              | I have had pain.                                                                                                                                                                        | 55               | 77 (MDD: 29;<br>FMS: 48) | 0.55<br>(MDD:<br>0.31;<br>FMS:<br>0.78) |
| Troubles<br>relaxing              | I have had trouble relaxing                                                                                                                                                             | 17               | 81 (MDD: 46;<br>FMS: 35) | 0.51<br>(MDD:<br>0.58;<br>FMS:<br>0.44) |
| Nervous or<br>tense               | I have been nervous or tense.                                                                                                                                                           | 18               | 72 (MDD: 47;<br>FMS: 25) | 0.46<br>(MDD:<br>0.61;<br>FMS: 0.3)     |
| Lack of drive                     | I have been lacking motivation or drive                                                                                                                                                 | 33               | 75 (MDD: 41;<br>FMS: 34) | 0.46<br>(MDD:<br>0.51;<br>FMS: 0.4)     |
| Excessive<br>effort<br>perception | Everything I have done has felt like a great effort.                                                                                                                                    | 61               | 68 (MDD: 37;<br>FMS: 31) | 0.46<br>(MDD:<br>0.49;<br>FMS:<br>0.42) |
| Concentration<br>problems         | I have had difficulties concentrating, paying attention, or staying focused.                                                                                                            | 1                | 74 (MDD: 39;<br>FMS: 35) | 0.41<br>(MDD:<br>0.43;<br>FMS:<br>0.39) |

|                         |                                                                                           |    |                          |                                         |
|-------------------------|-------------------------------------------------------------------------------------------|----|--------------------------|-----------------------------------------|
| Stressed                | I have been stressed.                                                                     | 50 | 73 (MDD: 39;<br>FMS: 34) | 0.4 (MDD:<br>0.4; FMS:<br>0.39)         |
| Depressed<br>mood       | I have often felt down, sad, or depressed.                                                | 39 | 66 (MDD: 42;<br>FMS: 24) | 0.38<br>(MDD:<br>0.54;<br>FMS:<br>0.22) |
| Stimulus<br>sensitivity | I have been highly sensitive to stimuli such as light,<br>noise, or smells                | 25 | 64 (MDD: 30;<br>FMS: 34) | 0.38<br>(MDD:<br>0.32;<br>FMS:<br>0.44) |
| Morning<br>stiffness    | I have suffered from morning stiffness.                                                   | 31 | 53 (MDD: 11;<br>FMS: 42) | 0.38<br>(MDD:<br>0.12;<br>FMS:<br>0.65) |
| Physical<br>weakness    | I have felt physically weak or lacked strength (e.g.,<br>unable to open a bottle).        | 22 | 65 (MDD: 27;<br>FMS: 38) | 0.37<br>(MDD:<br>0.27;<br>FMS:<br>0.47) |
| Ruminating              | I have ruminated a lot or had persistent negative<br>thoughts                             | 38 | 61 (MDD: 44;<br>FMS: 17) | 0.35<br>(MDD:<br>0.55;<br>FMS:<br>0.15) |
| Pull myself<br>together | I have often told myself to pull myself together                                          | 20 | 63 (MDD: 37;<br>FMS: 26) | 0.35<br>(MDD:<br>0.38;<br>FMS:<br>0.31) |
| Just<br>functioning     | I have just functioned                                                                    | 93 | 59 (MDD: 29;<br>FMS: 30) | 0.35<br>(MDD:<br>0.36;<br>FMS:<br>0.35) |
| Avoidance               | I have avoided activities that I usually enjoy due to<br>my physical or mental condition. | 10 | 76 (MDD: 39;<br>FMS: 37) | 0.34<br>(MDD:<br>0.39;                  |

|                             |                                                                                                                                                                                                                                             |    |                          |                                         |
|-----------------------------|---------------------------------------------------------------------------------------------------------------------------------------------------------------------------------------------------------------------------------------------|----|--------------------------|-----------------------------------------|
|                             |                                                                                                                                                                                                                                             |    |                          | FMS:<br>0.29)                           |
| Procrastinating             | I have procrastinated a lot.                                                                                                                                                                                                                | 51 | 63 (MDD: 33;<br>FMS: 30) | 0.34<br>(MDD:<br>0.39;<br>FMS:<br>0.29) |
| Digestive<br>problems       | I have had digestive problems (e.g. diarrhea,<br>constipation, cramps, bloating).                                                                                                                                                           | 26 | 65 (MDD: 31;<br>FMS: 34) | 0.34<br>(MDD:<br>0.31;<br>FMS:<br>0.36) |
| Paresthesia/<br>dysesthesia | I have experienced physical sensations such as<br>numbness, tingling, burning, or extreme sensitivity<br>to pain                                                                                                                            | 67 | 59 (MDD: 19;<br>FMS: 40) | 0.32<br>(MDD:<br>0.17;<br>FMS:<br>0.47) |
| Anhedonia                   | I have had little interest or enjoyment in my<br>activities.                                                                                                                                                                                | 36 | 60 (MDD: 35;<br>FMS: 25) | 0.31<br>(MDD:<br>0.37;<br>FMS:<br>0.25) |
| Sexual<br>dysfunction       | I have had little or no interest in sexual activities or<br>have suffered from sexual dysfunction (i.e. lack of<br>arousal, erection problems, lack of vaginal<br>lubrication, orgasm difficulties, or pain during or<br>from penetration). | 24 | 49 (MDD: 24;<br>FMS: 25) | 0.31<br>(MDD:<br>0.26;<br>FMS:<br>0.35) |
| Forgetfulness               | I have had trouble remembering things or have been<br>very forgetful.                                                                                                                                                                       | 2  | 59 (MDD: 36;<br>FMS: 23) | 0.29<br>(MDD:<br>0.36;<br>FMS:<br>0.22) |
| Reduced social<br>contacts  | I have limited my social contacts                                                                                                                                                                                                           | 9  | 68 (MDD: 37;<br>FMS: 31) | 0.29<br>(MDD:<br>0.35;<br>FMS:<br>0.23) |
| Emptiness                   | I have felt empty, numb, or emotionally dead inside                                                                                                                                                                                         | 71 | 50 (MDD: 35;<br>FMS: 15) | 0.28<br>(MDD:<br>0.4; FMS:<br>0.16)     |

|                          |                                                                         |    |                       |                             |
|--------------------------|-------------------------------------------------------------------------|----|-----------------------|-----------------------------|
| Muscle tension or cramps | I have had muscular cramps, tension or nystagmus                        | 72 | 62 (MDD: 24; FMS: 38) | 0.28 (MDD: 0.2; FMS: 0.35)  |
| Self-worth issues        | I have had a low opinion of myself or felt worthless or like a failure. | 37 | 45 (MDD: 36; FMS: 9)  | 0.27 (MDD: 0.46; FMS: 0.09) |
| Desperate/helpless       | I have felt desperate or helpless.                                      | 43 | 43 (MDD: 35; FMS: 8)  | 0.27 (MDD: 0.44; FMS: 0.11) |
| Hopelessness, pessimism  | I have felt hopeless or very pessimistic about my future.               | 40 | 42 (MDD: 35; FMS: 7)  | 0.27 (MDD: 0.44; FMS: 0.1)  |
| Lonely                   | I have often felt lonely.                                               | 41 | 46 (MDD: 28; FMS: 18) | 0.27 (MDD: 0.35; FMS: 0.19) |
| Heavy limbs              | I have felt that my limbs were very heavy.                              | 64 | 54 (MDD: 22; FMS: 32) | 0.27 (MDD: 0.2; FMS: 0.34)  |
| Indecisiveness           | I have had difficulties making decisions                                | 6  | 50 (MDD: 34; FMS: 16) | 0.26 (MDD: 0.35; FMS: 0.16) |
| Health worries           | I have had fears or worries about my health.                            | 15 | 56 (MDD: 35; FMS: 21) | 0.26 (MDD: 0.31; FMS: 0.21) |
| Sensitivity to weather   | I have been sensitive to the weather, including changes in the weather. | 78 | 54 (MDD: 16; FMS: 38) | 0.26 (MDD:                  |

|                           |                                                                                                                                                        |    |                       |                             |
|---------------------------|--------------------------------------------------------------------------------------------------------------------------------------------------------|----|-----------------------|-----------------------------|
|                           |                                                                                                                                                        |    |                       | 0.1; FMS:<br>0.41)          |
| Alexithymia               | I have had trouble recognizing, making sense of, or putting my feelings into words.                                                                    | 46 | 46 (MDD: 34; FMS: 12) | 0.25 (MDD: 0.4; FMS: 0.1)   |
| Generalized anxiety       | I have been anxious or worried about various activities or events.                                                                                     | 16 | 51 (MDD: 32; FMS: 19) | 0.25 (MDD: 0.34; FMS: 0.16) |
| Sympathetic activation    | I have had signs of physical arousal such as heart palpitations, skipped beats, shortness of breath, pressure or tightness in the chest, and sweating. | 30 | 67 (MDD: 33; FMS: 34) | 0.25 (MDD: 0.27; FMS: 0.23) |
| Physical inactivity       | I have not been physically active enough.                                                                                                              | 11 | 49 (MDD: 25; FMS: 24) | 0.25 (MDD: 0.25; FMS: 0.25) |
| Tinnitus                  | I have experienced ringing in my ears (e.g., hissing, buzzing, tinnitus).                                                                              | 62 | 50 (MDD: 20; FMS: 30) | 0.25 (MDD: 0.15; FMS: 0.34) |
| Anger                     | I have been angry, irritable or annoyed.                                                                                                               | 42 | 62 (MDD: 32; FMS: 30) | 0.24 (MDD: 0.22; FMS: 0.27) |
| Interrupting activities   | I have had to interrupt activities or work due to my physical or mental condition.                                                                     | 7  | 67 (MDD: 34; FMS: 33) | 0.24 (MDD: 0.21; FMS: 0.27) |
| Exceeding physical limits | I have engaged in activities even though they exceeded my physical limits.                                                                             | 69 | 52 (MDD: 20; FMS: 32) | 0.24 (MDD: 0.19; FMS: 0.29) |

|                                     |                                                                                                    |    |                       |                             |
|-------------------------------------|----------------------------------------------------------------------------------------------------|----|-----------------------|-----------------------------|
| Guilt                               | I have felt guilty about things I did, things outside of my control, or things that happened to me | 54 | 44 (MDD: 34; FMS: 10) | 0.23 (MDD: 0.37; FMS: 0.08) |
| Hot or cold flashes                 | I have had hot or cold flashes.                                                                    | 79 | 47 (MDD: 16; FMS: 31) | 0.23 (MDD: 0.1; FMS: 0.35)  |
| Dry mucous membranes or watery eyes | My mucous membranes (e.g. in the mouth, eyes) have been very dry or my eyes have watered           | 73 | 40 (MDD: 12; FMS: 28) | 0.23 (MDD: 0.09; FMS: 0.36) |
| Self-neglect                        | I have ignored my needs or neglected myself.                                                       | 85 | 46 (MDD: 32; FMS: 14) | 0.22 (MDD: 0.31; FMS: 0.13) |
| Suppressed aggressions              | I have kept my anger or irritation to myself                                                       | 70 | 50 (MDD: 32; FMS: 18) | 0.22 (MDD: 0.27; FMS: 0.17) |
| Difficulty managing daily life      | I have struggled to fulfill my obligations or manage my daily life.                                | 57 | 51 (MDD: 28; FMS: 23) | 0.22 (MDD: 0.26; FMS: 0.18) |
| Ashamed                             | I have frequently felt ashamed.                                                                    | 86 | 40 (MDD: 35; FMS: 5)  | 0.21 (MDD: 0.38; FMS: 0.04) |
| Burden to others                    | I have felt like a burden to others.                                                               | 84 | 43 (MDD: 30; FMS: 13) | 0.21 (MDD: 0.31; FMS: 0.11) |



|                                       |                                                                                                                                                                                             |    |                       |                             |
|---------------------------------------|---------------------------------------------------------------------------------------------------------------------------------------------------------------------------------------------|----|-----------------------|-----------------------------|
| Gastrointestinal or swallowing issues | I have had stomach or swallowing problems such as nausea, acid reflux, heartburn, a lump in the throat, gagging when swallowing, regurgitation of swallowed food, or coughing while eating. | 68 | 48 (MDD: 20; FMS: 28) | 0.21 (MDD: 0.18; FMS: 0.25) |
| Slow information processing           | It has taken me a long time to process new information                                                                                                                                      | 4  | 39 (MDD: 22; FMS: 17) | 0.2 (MDD: 0.23; FMS: 0.16)  |
| Brain fog                             | I have often felt mentally unclear or have had brain fog                                                                                                                                    | 5  | 44 (MDD: 26; FMS: 18) | 0.19 (MDD: 0.22; FMS: 0.15) |
| Changes in appetite                   | I have had significantly more or less appetite than usual or experienced binge eating.                                                                                                      | 83 | 38 (MDD: 21; FMS: 17) | 0.19 (MDD: 0.2; FMS: 0.18)  |
| Attention to pain                     | I have frequently focused on my pain or thought about it a lot.                                                                                                                             | 13 | 33 (MDD: 15; FMS: 18) | 0.19 (MDD: 0.15; FMS: 0.22) |
| Mood swings                           | I have experienced severe mood swings.                                                                                                                                                      | 60 | 40 (MDD: 27; FMS: 13) | 0.18 (MDD: 0.24; FMS: 0.12) |
| Hypersomnia                           | I have fallen asleep during the day or struggled to stay awake.                                                                                                                             | 76 | 42 (MDD: 21; FMS: 21) | 0.18 (MDD: 0.14; FMS: 0.21) |
| Movement difficulties                 | I have only been able to move with great difficulty or slowly                                                                                                                               | 65 | 34 (MDD: 13; FMS: 21) | 0.18 (MDD: 0.12; FMS: 0.23) |
| Negative eating habits                | I have overeaten, eaten too little, or skipped meals.                                                                                                                                       | 32 | 47 (MDD: 29; FMS: 18) | 0.17 (MDD: 0.21;            |

|                                               |                                                                                                     |    |                          |                                         |
|-----------------------------------------------|-----------------------------------------------------------------------------------------------------|----|--------------------------|-----------------------------------------|
|                                               |                                                                                                     |    |                          | FMS:<br>0.13)                           |
| Fear of pain<br>aggravation or<br>persistence | I have feared that my pain would worsen or never go<br>away.                                        | 14 | 33 (MDD: 16;<br>FMS: 17) | 0.16<br>(MDD:<br>0.14;<br>FMS:<br>0.19) |
| Anticipatory<br>fear of pain                  | I have been afraid of situations in which pain could<br>occur or worsen.                            | 56 | 32 (MDD: 18;<br>FMS: 14) | 0.16<br>(MDD:<br>0.13;<br>FMS:<br>0.18) |
| Computer<br>games/social<br>media             | I have spent excessive time gaming, streaming, or<br>using social media.                            | 91 | 27 (MDD: 19;<br>FMS: 8)  | 0.15<br>(MDD:<br>0.22;<br>FMS:<br>0.07) |
| Vision                                        | I have only been able to see very blurry or out of<br>focus (even with glasses).                    | 66 | 32 (MDD: 11;<br>FMS: 21) | 0.15<br>(MDD:<br>0.07;<br>FMS:<br>0.23) |
| Swollen body<br>parts                         | I have felt that parts of my body have been swollen.                                                | 27 | 36 (MDD: 9;<br>FMS: 27)  | 0.15<br>(MDD:<br>0.05;<br>FMS:<br>0.25) |
| Vertigo/<br>imbalance                         | I have frequently felt dizzy or have had balance<br>issues.                                         | 29 | 38 (MDD: 19;<br>FMS: 19) | 0.14<br>(MDD:<br>0.12;<br>FMS:<br>0.15) |
| Too little<br>breaks                          | I have taken too few breaks.                                                                        | 48 | 30 (MDD: 13;<br>FMS: 17) | 0.14<br>(MDD:<br>0.1; FMS:<br>0.18)     |
| Overwhelmed<br>by pain                        | I have felt overwhelmed by the pain, at the mercy of<br>it, or as if I could not endure it anymore. | 44 | 26 (MDD: 9;<br>FMS: 17)  | 0.14<br>(MDD:<br>0.09;<br>FMS:<br>0.19) |

|                                          |                                                                                                                 |    |                       |                             |
|------------------------------------------|-----------------------------------------------------------------------------------------------------------------|----|-----------------------|-----------------------------|
| Bladder issues                           | I have had bladder problems (burning, pain, cramps, frequent urination, or nighttime urination).                | 75 | 26 (MDD: 7; FMS: 19)  | 0.14 (MDD: 0.05; FMS: 0.22) |
| Perceived life failure                   | I have felt like my life was a failure.                                                                         | 59 | 27 (MDD: 24; FMS: 3)  | 0.13 (MDD: 0.24; FMS: 0.03) |
| Speech slowness / word finding struggles | My speech has been slow, or I have often struggled to find the right words.                                     | 3  | 33 (MDD: 20; FMS: 13) | 0.13 (MDD: 0.16; FMS: 0.1)  |
| Physical restlessness                    | I have fidgeted with my hands and/or feet and/or had an increased urge to move.                                 | 19 | 30 (MDD: 21; FMS: 9)  | 0.12 (MDD: 0.15; FMS: 0.09) |
| Future plans based on pain               | I have made future plans based on my pain.                                                                      | 12 | 30 (MDD: 12; FMS: 18) | 0.12 (MDD: 0.09; FMS: 0.16) |
| Hair loss                                | I have had severe hair loss.                                                                                    | 81 | 18 (MDD: 8; FMS: 10)  | 0.12 (MDD: 0.09; FMS: 0.15) |
| Anxiety attacks                          | I have had sudden attacks of intense anxiety that escalated rapidly and peaked within minutes (anxiety attacks) | 74 | 32 (MDD: 26; FMS: 6)  | 0.11 (MDD: 0.19; FMS: 0.03) |
| Paralyzed                                | I have felt paralyzed.                                                                                          | 92 | 22 (MDD: 15; FMS: 7)  | 0.11 (MDD: 0.15; FMS: 0.08) |

|                            |                                                                                  |    |                       |                             |
|----------------------------|----------------------------------------------------------------------------------|----|-----------------------|-----------------------------|
| Not leaving the house      | I have rarely or never left the house.                                           | 8  | 32 (MDD: 19; FMS: 13) | 0.11 (MDD: 0.14; FMS: 0.09) |
| Perceived social rejection | I have felt that other people were particularly unfriendly to me or disliked me. | 58 | 26 (MDD: 16; FMS: 10) | 0.1 (MDD: 0.13; FMS: 0.07)  |
| Weight changes             | I have lost or gained a lot of weight without dieting.                           | 28 | 14 (MDD: 7; FMS: 7)   | 0.1 (MDD: 0.12; FMS: 0.08)  |
| Incontinence               | I have had difficulty controlling my bladder or bowel movements.                 | 88 | 21 (MDD: 6; FMS: 15)  | 0.1 (MDD: 0.06; FMS: 0.13)  |
| Suicidal thoughts          | I have had suicidal thoughts or wished I were dead.                              | 34 | 24 (MDD: 22; FMS: 2)  | 0.09 (MDD: 0.16; FMS: 0.01) |
| Nightmares                 | I have had nightmares.                                                           | 87 | 36 (MDD: 24; FMS: 12) | 0.09 (MDD: 0.12; FMS: 0.07) |
| Crying                     | I have cried excessively.                                                        | 52 | 20 (MDD: 15; FMS: 5)  | 0.07 (MDD: 0.12; FMS: 0.02) |
| Interpersonal conflicts    | I have had interpersonal conflicts                                               | 47 | 24 (MDD: 16; FMS: 8)  | 0.07 (MDD: 0.09; FMS: 0.06) |
| Twitches                   | I have had muscle twitches.                                                      | 77 | 22 (MDD: 11; FMS: 11) | 0.07 (MDD:                  |

|                   |                                                                                                                    |    |                         |                                         |
|-------------------|--------------------------------------------------------------------------------------------------------------------|----|-------------------------|-----------------------------------------|
|                   |                                                                                                                    |    |                         | 0.05;<br>FMS: 0.1)                      |
| Feeling punished  | I have felt as if I was being punished.                                                                            | 53 | 17 (MDD: 8;<br>FMS: 9)  | 0.07<br>(MDD:<br>0.05;<br>FMS:<br>0.09) |
| Depersonalization | I have felt like I was disconnected from my body and mind or had the feeling of observing myself from the outside. | 63 | 16 (MDD: 14;<br>FMS: 2) | 0.06<br>(MDD:<br>0.12;<br>FMS:<br>0.01) |
| Tremor            | My hands or other body parts have trembled constantly (excluding eye tremors).                                     | 80 | 15 (MDD: 11;<br>FMS: 4) | 0.06<br>(MDD:<br>0.1; FMS:<br>0.02)     |
| Bored             | I have been bored.                                                                                                 | 49 | 16 (MDD: 13;<br>FMS: 3) | 0.05<br>(MDD:<br>0.08;<br>FMS:<br>0.03) |
| Substance abuse   | I have consumed excessive amounts of drugs, medications, alcohol, or smoked too much.                              | 45 | 12 (MDD: 6;<br>FMS: 6)  | 0.05<br>(MDD:<br>0.02;<br>FMS:<br>0.07) |
| Cough             | I have had a persistent cough.                                                                                     | 82 | 9 (MDD: 5;<br>FMS: 4)   | 0.04<br>(MDD:<br>0.04;<br>FMS:<br>0.04) |
| Gambling          | I have gambled excessively                                                                                         | 90 | 1 (MDD: 0;<br>FMS: 1)   | 0.01<br>(MDD: 0;<br>FMS:<br>0.02)       |
| Hallucinations    | I have had hallucinations or delusions.                                                                            | 89 | 1 (MDD: 1;<br>FMS: 0)   | 0 (MDD:<br>0; FMS: 0)                   |

|           |                      |    |                       |                             |
|-----------|----------------------|----|-----------------------|-----------------------------|
| Self-harm | I have harmed myself | 35 | 4 (MDD: 4;<br>FMS: 0) | 0 (MDD:<br>0.01;<br>FMS: 0) |
|-----------|----------------------|----|-----------------------|-----------------------------|

---

*Table S2: The final symptom list that was used in our study, ordered by the symptom impact factor (SIF) over both samples. Label = Symptom label used in the manuscript; Item = Formulation of the item in the list; Nbr. = Number of the symptom in the list; Selected: How many persons selected the symptom, overall and stratified by group; SIF = Symptom impact factor = ((frequency \* severity) / 800) \* percentage selected, overall and stratified by group.*

**Table S3: Symptom list development**

| <b>Item<br/>(abbreviation)</b> | <b>Item<br/>number<br/>in final<br/>list</b> | <b>Changes made<br/>throughout the<br/>process</b> | <b>Reason(s) for change</b>                              | <b>Was<br/>added/changed/delete<br/>d during...</b>                                             |
|--------------------------------|----------------------------------------------|----------------------------------------------------|----------------------------------------------------------|-------------------------------------------------------------------------------------------------|
| Concentration problems         | 1                                            |                                                    |                                                          | Added during: Initial literature review (Kravitz & Katz, 2015)                                  |
| Forgetfulness                  | 2                                            |                                                    |                                                          | Added during: Initial literature review (Kravitz & Katz, 2015)                                  |
| Concentration problems         | 3                                            |                                                    |                                                          | Added during: Initial literature review (Kravitz & Katz, 2015)                                  |
| Slow information processing    | 4                                            |                                                    |                                                          | Added during: Initial literature review (Kravitz & Katz, 2015)                                  |
| Brain fog                      | 5                                            | Added: “and/or feeling foggy”                      | “Brainfog”/”Fibrofog” was mentioned repeatedly in PS FMS | Added during: Initial literature review (Kravitz & Katz, 2015)<br><br>Complemented after PS FMS |
| Indecisiveness                 | 6                                            |                                                    |                                                          | Added during: Initial literature review (Kravitz & Katz, 2015)                                  |

|                                      |   |                                                                                                   |                                                                                                                                                                                                                                  |                                                                     |
|--------------------------------------|---|---------------------------------------------------------------------------------------------------|----------------------------------------------------------------------------------------------------------------------------------------------------------------------------------------------------------------------------------|---------------------------------------------------------------------|
| Interrupting activities              | 7 | Initial phrase: “I have interrupted activities/tasks, when I started to feel pain”                |                                                                                                                                                                                                                                  | Added during: Initial literature review (McCracken & Dhingra, 2002) |
|                                      |   | First change: “I have interrupted activities/task”                                                |                                                                                                                                                                                                                                  | First change: before PS FMS                                         |
|                                      |   |                                                                                                   | First change: To leave space for explanations for the behavior other than “pain” the second part of the phrase was deleted                                                                                                       |                                                                     |
|                                      |   | Second change: “I have interrupted activities/task because of my physical or mental constitution” | Second change: To prevent people from picking the item because of external factors (e.g. “I have interrupted my task because I had to pick up my kids from school”) “...because of my physical or mental constitution” was added | Second change: after PS FMS                                         |
| Medication intake when there is pain |   | Item in ES                                                                                        | Became part of “substance abuse” (Item 45)                                                                                                                                                                                       | Added during: Initial literature review (McCracken & Dhingra, 2002) |
|                                      |   | Deleted                                                                                           | to leave space for explanations for the behavior other than “pain”                                                                                                                                                               | Deleted after: ES FMS                                               |
| Not leaving the house                | 8 | Added: “never”                                                                                    | For more precision                                                                                                                                                                                                               | Added during: Initial literature review (Klintwall et al., 2023)    |
| Reduced social contacts              | 9 | Initial phrase: “I have reduced my social contacts because of pain”                               | To leave space for explanations for the behavior other than “pain”                                                                                                                                                               | Added during: Initial literature review (Ware et al., 1996)         |
|                                      |   | was changed to “I                                                                                 |                                                                                                                                                                                                                                  | Changed after ES FMS                                                |



|                     |    |                                                                                                                 |                                                                                                                                                                                                                                  |                                                                  |
|---------------------|----|-----------------------------------------------------------------------------------------------------------------|----------------------------------------------------------------------------------------------------------------------------------------------------------------------------------------------------------------------------------|------------------------------------------------------------------|
|                     |    | have reduced my social contacts”                                                                                |                                                                                                                                                                                                                                  |                                                                  |
| Avoidance           | 10 | Original phrase: “I have refrained from activities, when there was the risk that pain would appear/aggravate”   |                                                                                                                                                                                                                                  | Added during: Initial literature review (Wicksell et al., 2010)  |
|                     |    | First change: “I have refrained from activities I usually enjoy”                                                |                                                                                                                                                                                                                                  |                                                                  |
|                     |    |                                                                                                                 | First change: To leave space for explanations for the behavior other than “pain” the second part of the phrase was deleted                                                                                                       | First change: before PS FMS                                      |
|                     |    | Second change: “I have refrained from activities I usually enjoy because of my physical or mental constitution” | Second change: To prevent people from picking the item because of external factors (e.g. “I have interrupted my task because I had to pick up my kids from school”) “...because of my physical or mental constitution” was added | Second change: after PS FMS                                      |
| Physical inactivity | 11 |                                                                                                                 |                                                                                                                                                                                                                                  | Added during: Initial literature review (Klintwall et al., 2023) |

|                                         |    |                                                                                                                                                                |                                                                                                                                                                                          |                                                                                                                                         |
|-----------------------------------------|----|----------------------------------------------------------------------------------------------------------------------------------------------------------------|------------------------------------------------------------------------------------------------------------------------------------------------------------------------------------------|-----------------------------------------------------------------------------------------------------------------------------------------|
| Future plans based on pain              | 12 |                                                                                                                                                                |                                                                                                                                                                                          | Added during: Initial literature review (Wicksell et al., 2010)                                                                         |
| Attention to pain                       | 13 |                                                                                                                                                                |                                                                                                                                                                                          | Added during: Initial literature review (Meyer et al., 2008)                                                                            |
| Fear of pain aggravation or persistence | 14 |                                                                                                                                                                |                                                                                                                                                                                          | Added during: Initial literature review (Meyer et al., 2008)                                                                            |
| Fear of pain aggravation or persistence | 15 |                                                                                                                                                                |                                                                                                                                                                                          | Added during: Initial literature review (Klintwall et al., 2023)                                                                        |
| Generalized anxiety                     | 16 | Initial phrase: “Feeling afraid as if something awful might happen” was changed to: “I was afraid/worried because of all different kinds of activities/events” | “anxiety/ anxiety in general” was mentioned repeatedly in PS FMS                                                                                                                         | Added during: Initial literature review (Gräfe et al., 2004; Hinz et al., 2017; Spitzer et al., 2006)<br><br>Changed after: PS FMS      |
| Troubles relaxing                       | 17 |                                                                                                                                                                |                                                                                                                                                                                          | Added during: Initial literature review (Gräfe et al., 2004; Hinz et al., 2017; Spitzer et al., 2006)                                   |
| Nervous or tense                        | 18 | Initial phrase: “I have been nervous, anxious or tense” was changed to “I have been nervous or tense”                                                          | “feeling anxious” was deleted from the sentence because of a remark during the pilot study saying that there were too many items depicting worriedness (15, 16, 17, 18, “Inner turmoil”) | Added during: Initial literature review (Gräfe et al., 2004; Hinz et al., 2017; Spitzer et al., 2006)<br><br>Changed after: Pilot study |

|                       |    |                                                                                                                                                                               |                                                                       |
|-----------------------|----|-------------------------------------------------------------------------------------------------------------------------------------------------------------------------------|-----------------------------------------------------------------------|
| Physical restlessness | 19 | Initial phrase: “I have been agitated and restless”                                                                                                                           | Added during: Initial literature review (Gräfe et al., 2004)          |
|                       |    | First change: “I have been physically agitated, restless and fidgety, I have had an increased urge to move”,                                                                  | First change: after ES FMS                                            |
|                       |    | First change because of a recommendation during the ES FMS to differentiate between inner and physical unrest.                                                                |                                                                       |
|                       |    | Second change: “I have fidgeted with my hands and/or feet or I have had an increased urge to move”                                                                            | Second change: after pilot study                                      |
|                       |    | Second change after a remark during the pilot study saying that items 17,18 and 19 were too alike                                                                             |                                                                       |
| Pull myself together  | 20 |                                                                                                                                                                               | Added during: Initial literature review (Hasenbring & Verbunt, 2010)  |
| Fatigue               | 21 |                                                                                                                                                                               | Added during: Initial literature review (Klintwall et al., 2023)      |
| Weakness              | 22 | Initial phrase: “I have felt weak”                                                                                                                                            | Added during: Initial literature review (Galvez-Sánchez et al., 2019) |
|                       |    | First change: “I have felt weak or feeble”                                                                                                                                    | First change: After ES FMS                                            |
|                       |    | First change: “...or feeble” it of remark during the ES FMS saying that “feebleness, e.g. not being able to open a bottle, letting things slide out of the hands) was missing |                                                                       |

|                |    |                                                                                                                                                                              |                                                                                                                                                                                                        |
|----------------|----|------------------------------------------------------------------------------------------------------------------------------------------------------------------------------|--------------------------------------------------------------------------------------------------------------------------------------------------------------------------------------------------------|
|                |    | Second change: “Physical non-resilience” was mentioned in the PS FMS                                                                                                         | Second change: After PS FMS                                                                                                                                                                            |
|                |    | Second change: “I have felt physically weak, not resilient and/or I have lacked physical strength (e.g. not being able to open a bottle)                                     |                                                                                                                                                                                                        |
| Sleep problems | 23 | Initial phrase: “I have had sleep problems (e.g. difficulties falling or staying asleep, waking up too early”                                                                | Added during: Initial literature review (Klintwall et al., 2023)                                                                                                                                       |
|                |    | First change: “I have had sleep problems (e.g. difficulties falling or staying asleep, waking up too early) or I slept too much (e.g. during the day),                       | First change: Further research after ES FMS (Fried, 2017; Gräfe et al., 2004; Sarzi-Puttini et al., 2021)                                                                                              |
|                |    | Second change: “I have had problems falling/staying asleep/ I’ve woken up earlier than I wanted to (early in the morning) or I have perceived my sleep as unrefreshing, even | First change: “...or I slept too much (e.g. during the day)” was added to cover “hypersomnia”, a symptom occurring in MDD (Gräfe et al., 2004) as well as in fibromyalgia (Sarzi-Puttini et al., 2021) |
|                |    |                                                                                                                                                                              | Second change: Further research after PS FMS (Häuser et al., 2008)                                                                                                                                     |
|                |    |                                                                                                                                                                              | Second change: Decision to divide Insomnia and Hypersomnia in two items (-> item 76) because of further research (Fried, 2017)                                                                         |

|                    |    |                                                                                                                                                                                                                                                                                                                                                                                                                                                                                                                                                                       |                                                                                                                   |                                                                                                            |
|--------------------|----|-----------------------------------------------------------------------------------------------------------------------------------------------------------------------------------------------------------------------------------------------------------------------------------------------------------------------------------------------------------------------------------------------------------------------------------------------------------------------------------------------------------------------------------------------------------------------|-------------------------------------------------------------------------------------------------------------------|------------------------------------------------------------------------------------------------------------|
|                    |    | though I had slept enough                                                                                                                                                                                                                                                                                                                                                                                                                                                                                                                                             | “Unrefreshing sleep” was added because of its importance in fibromyalgia (Häuser et al., 2008)                    |                                                                                                            |
| Sexual dysfunction | 24 | <p>Initial phrase: “I have suffered from sexual dysfunction”</p> <p>First change: “I have suffered from sexual dysfunction (e.g. lack of arousal, erection problems or lack of vaginal moisture, orgasm difficulties, pain during or through penetration) or I have had no interest/fun in sexual activities”,</p> <p>Second change: “I have had no interest/fun in sexual activities” or “I have suffered from sexual dysfunction (e.g. lack of arousal, erection problems or lack of vaginal moisture, orgasm difficulties, pain during or through penetration)</p> | <p>Definition of sexual dysfunction (Berner, M.M. et al., 2004) was added to avoid patients not understanding</p> | <p>Added during: Initial literature review (Besiroglu &amp; Dursun, 2019)</p> <p>Changed before PS FMS</p> |

|                      |    |                                                                                                                                                                                                                              |                                                                                                                                                                                              |                                                                                                                                         |
|----------------------|----|------------------------------------------------------------------------------------------------------------------------------------------------------------------------------------------------------------------------------|----------------------------------------------------------------------------------------------------------------------------------------------------------------------------------------------|-----------------------------------------------------------------------------------------------------------------------------------------|
| Stimulus sensitivity | 25 | Initial phrase: "I have been very sensitive to stimuli" was changed to "I have been very sensitive to stimuli (e.g. light, noise, smell)                                                                                     | Complemented after remark during the ES FMS that "sensitivity to light, noise, sometimes smell" was missing                                                                                  | Added during: Initial literature review (Clauw, 2009)<br><br>Complemented after ES FMS                                                  |
| Digestive problems   | 26 | Initial phrase: "I have had digestive problems"<br><br>First change: "I have had digestive problems or bladder issues"<br><br>Second change: "I have had digestive problems (e.g. diarrhea, obstipation, cramps, flatulence) | First change: Bladder issues were added after being mentioned in ES FMS<br><br>Second change: Item was divided in two (Bladder issues -> Item 75) to avoid items covering several constructs | Added during: Initial literature review (Gierk et al., 2014)<br><br>First change: After ES FMS<br><br>Second change: After PS FMS       |
| Swollen body parts   | 27 |                                                                                                                                                                                                                              |                                                                                                                                                                                              | Added during: Initial literature review (Chakrabarty & Zoorob, 2007)                                                                    |
| Weight changes       | 28 | Initial phrase: "I have had drastic changes in weight" was changed to "I have lost/gained weight without changing my diet"                                                                                                   | For more precision, derived from SCID-CV (Beesdo-Baum et al., 2019)                                                                                                                          | Added during: Initial literature review (Clauw, 2009)<br><br>Changed after further research after the PS FMS (Beesdo-Baum et al., 2019) |

|                        |    |                                                                                                                                                                                |                                                                                                                                                                                                                                                                                                                            |                                                                                               |
|------------------------|----|--------------------------------------------------------------------------------------------------------------------------------------------------------------------------------|----------------------------------------------------------------------------------------------------------------------------------------------------------------------------------------------------------------------------------------------------------------------------------------------------------------------------|-----------------------------------------------------------------------------------------------|
| Vertigo/ imbalance     | 29 | Initial phrase: “I have often felt dizzy” was changed to: “I have often felt dizzy or have had an impaired balance”                                                            | Complemented after remark during the ES FMS that “impaired balance” was missing                                                                                                                                                                                                                                            | Added during: Initial literature review (Gierk et al., 2014)<br><br>Complemented after ES FMS |
| Sympathetic activation | 30 | Initial phrase: ”My heart has been racing or I have had a shortness of breath” was                                                                                             |                                                                                                                                                                                                                                                                                                                            | Added during: Initial literature review (Gräfe et al., 2004)                                  |
|                        |    | First change: “I have had physical reactions such as: feeling my heart racing, shortness of breath, heavy sweating, hot or cold flashes”                                       | First change: More symptoms representing physical arousal were added (Fried, 2017)                                                                                                                                                                                                                                         | First change before PS FMS                                                                    |
|                        |    | Second change: “I have felt signs of physical arousal such as: feeling my heart racing, palpitations, shortness of breath, pressure or tightness in the chest, heavy sweating” | Second change: “panic attack” was mentioned repeatedly in PS FMS<br><br>As it was decided to avoid the term “panic attack” in favor of an indirect way (Krasselt & Baerwald, 2018) to ask for the construct, more symptoms representing sympathetic activation during a panic attack (Beesdo-Baum et al., 2019) were added | Second change after PS FMS and internal discussion                                            |

|                        |    |                                                                                                                                                            |                                                                                                                                                                                 |                                                                                                                                                                      |
|------------------------|----|------------------------------------------------------------------------------------------------------------------------------------------------------------|---------------------------------------------------------------------------------------------------------------------------------------------------------------------------------|----------------------------------------------------------------------------------------------------------------------------------------------------------------------|
|                        |    |                                                                                                                                                            |                                                                                                                                                                                 | <p>“Hot or cold flashes” became a single item (79) as it was concluded during an internal discussion that there could be other reasons for them (e.g. menopause)</p> |
| Morning stiffness      | 31 |                                                                                                                                                            |                                                                                                                                                                                 | Added during: Initial literature review (Chakrabarty & Zoorob, 2007)                                                                                                 |
| Negative eating habits | 32 |                                                                                                                                                            |                                                                                                                                                                                 | Added during: Initial literature review (Klintwall et al., 2023)                                                                                                     |
| Lack of drive          | 33 |                                                                                                                                                            |                                                                                                                                                                                 | Added during: Initial literature review (Dilling et al., 2015)                                                                                                       |
| Suicidal thoughts      | 34 | Initial phrase: “I have had suicidal thoughts” was changed to: I have thought about taking my own life or have thought that it would be better to be dead” | <p>Was marked as incomprehensible in the PS FMS</p> <p>In the following internal discussion, it was concluded that “suicidal thoughts” might be considered a technical term</p> | <p>Added during: Initial literature review (Klintwall et al., 2023)</p> <p>Changed after PS FMS</p>                                                                  |
| Self-harm              | 35 |                                                                                                                                                            |                                                                                                                                                                                 | Added during: Initial literature review (Klintwall et al., 2023)                                                                                                     |
| Anhedonia              | 36 |                                                                                                                                                            |                                                                                                                                                                                 | Added during: Initial literature review (Gräfe et al., 2004)                                                                                                         |
| Self-worth issues      | 37 | Initial phrase: “I have had a low opinion of myself or felt like a loser” was changed to :” I have had a low opinion of myself or felt                     | Worthlessness was added to align with (Fried, 2017)                                                                                                                             | <p>Added during: Initial literature review (Gräfe et al., 2004)</p> <p>Complemented before PS MDD to align with (Fried, 2017)</p>                                    |



|                         |    |                                                                                                                                                                                          |                                                                                                              |                                                                                                                                    |
|-------------------------|----|------------------------------------------------------------------------------------------------------------------------------------------------------------------------------------------|--------------------------------------------------------------------------------------------------------------|------------------------------------------------------------------------------------------------------------------------------------|
|                         |    | worthless/like a loser”                                                                                                                                                                  |                                                                                                              |                                                                                                                                    |
| Ruminating              | 38 | Initial phrase: “I have ruminated a lot” was changed to: “I have ruminated a lot or I have been spiraling”                                                                               | Was mentioned in PS MDD                                                                                      | Added during: Initial literature review (Klintwall et al., 2023)<br><br>Complemented after PS MDD                                  |
| Depressed mood          | 39 | Initially two items: “I have often felt down” and “I have been sad” were combined to: “I have often felt down, sad or depressed”                                                         | “Feeling down” and “feeling sad” was too alike<br><br>“Feeling depressed” was mentioned repeatedly in PS FMS | Added during: Initial literature review (Gräfe et al., 2004; Klintwall et al., 2023)<br><br>Combined and complemented after PS FMS |
| Hopelessness, pessimism | 40 | Initially two items: “I have been hopeless” and “I have had a pessimistic regard concerning my future”, were combined to: “I have felt hopeless or had a pessimistic view of my future.” | Approach to reduce number of items by combining items too alike                                              | Added during: Initial literature review (Gräfe et al., 2004)<br><br>Combined after PS FMS                                          |
| Lonely                  | 41 |                                                                                                                                                                                          |                                                                                                              | Added during: Initial literature review (Klintwall et al., 2023)                                                                   |
| Anger                   | 42 | Initial phrase: “I have felt angry or irritated” was changed to: “I have felt angry, irritated or annoyed”                                                                               | For more precision                                                                                           | Added during: Initial literature review (Klintwall et al., 2023)                                                                   |

|                     |    |                                                                                                                                                                                                              |                                                                                         |                                                                                                      |
|---------------------|----|--------------------------------------------------------------------------------------------------------------------------------------------------------------------------------------------------------------|-----------------------------------------------------------------------------------------|------------------------------------------------------------------------------------------------------|
| Desperate/helpless  | 43 | Initially two items:<br><br>“I have been desperate” and “I have felt helpless”, were combined to: “I have been desperate or felt helpless”                                                                   | Approach to reduce number of items by combining items too alike                         | Added during: Initial literature review (Palomino et al., 2007)<br><br>Combined after PS FMS         |
| Overwhelmed by pain | 44 | Initially two items:<br><br>“I have felt overwhelmed by/surrendered to the pain” and “I could not bear the pain” were combined to: ““I have felt overwhelmed by/surrendered to the pain or could not bear it | Approach to reduce number of items by combining items too alike (Sullivan et al., 1995) | Added during: Initial literature review (Meyer et al., 2008)<br><br>Combined after PS FMS            |
| Substance abuse     | 45 | Initial phrase: “I have consumed too much/many alcohol/drugs/pills” was changed to “I have consumed too much/many alcohol/drugs/pills or smoked to much”                                                     | Smoking was added as it is a common drug                                                | Added during: Initial literature review (Klintwall et al., 2023)<br><br>“Smoking” added after PS FMS |
| Alexithymia         | 46 | Initial phrase: “I have struggled with expressing or feeling my emotions” was changed to: “I have struggled with expressing, feeling or sorting my emotions”                                                 | For more precision                                                                      | Added during: Initial literature review (Galvez-Sánchez et al., 2019) Complemented after PS FMS      |

|                                                              |    |                                                                                                                                 |                                          |                                                                         |
|--------------------------------------------------------------|----|---------------------------------------------------------------------------------------------------------------------------------|------------------------------------------|-------------------------------------------------------------------------|
| Interpersonal conflicts                                      | 47 |                                                                                                                                 |                                          | Added during: Initial literature review (Klintwall et al., 2023)        |
| Too little breaks                                            | 48 |                                                                                                                                 |                                          | Added during: Initial literature review (Hasenbring & Verbunt, 2010)    |
| Bored                                                        | 49 |                                                                                                                                 |                                          | Added during: Initial literature review (Klintwall et al., 2023)        |
| Stressed                                                     | 50 |                                                                                                                                 |                                          | Added during: Initial literature review (Klintwall et al., 2023)        |
| Procrastinating                                              | 51 | Initial phrase: "I have procrastinated or postponed many things" was changed to: "I have postponed many things (procrastinated) | Was marked as incomprehensible in PS FMS | Added during: Initial literature review (Klintwall et al., 2023)        |
| <b>Symptoms added at a stage other than initial research</b> |    |                                                                                                                                 |                                          |                                                                         |
| Crying                                                       | 52 |                                                                                                                                 | To align with Fried (2017)               | Added during: literature review between ES FMS and PS FMS (Fried, 2017) |
| Feeling punished                                             | 53 |                                                                                                                                 | To align with Fried (2017)               | Added during: literature review between ES FMS and PS FMS (Fried, 2017) |

|                                |    |                                                                                                                                                         |                                                                                                                                                                                                                                                 |                                                                                       |
|--------------------------------|----|---------------------------------------------------------------------------------------------------------------------------------------------------------|-------------------------------------------------------------------------------------------------------------------------------------------------------------------------------------------------------------------------------------------------|---------------------------------------------------------------------------------------|
| Guilt                          | 54 | First added as: "I have had feelings of guilt", then changed to: "I have felt guilty for things I have or have not done or which have happened to me"   | To align with Fried (2017)<br><br>Changed because it was marked as incomprehensible during PS FMS                                                                                                                                               | Added during: literature review between ES FMS and PS FMS (Fried, 2017)               |
| Pain                           | 55 |                                                                                                                                                         | Pain had not been added before as there was the idea to make it an obligation to have pain in the networks. This idea was dismissed in order to have networks which truly represent the patients symptoms                                       | Added during: literature review between ES FMS and PS FMS (Krasselt & Baerwald, 2018) |
| Anticipatory fear of pain      | 56 |                                                                                                                                                         | "Being afraid of movement" was mentioned in ES FMS<br><br>In order to have a broader item which covers up for pain magnification as a subcategory of pain catastrophizing (Sullivan et al., 1995) the wording was held in a more general matter | Added during: literature review between ES FMS and PS FMS (Sullivan et al., 1995)     |
| Difficulty managing daily life | 57 | Initial phrase: "I have not been able to fulfill obligations" was changed to : "I have not been able to fulfill obligations or to manage everyday life" | Added as it reflects reduced quality of life (Ware et al., 1996)<br><br>Complemented to cover up for even more aspects of reduced quality of life (Ware et al., 1996)                                                                           | Added during: literature review between ES FMS and PS FMS (Ware et al., 1996)         |

|                             |    |                                                                                                                                                                                                                                                         |                                                                                                             |                                                                                                           |
|-----------------------------|----|---------------------------------------------------------------------------------------------------------------------------------------------------------------------------------------------------------------------------------------------------------|-------------------------------------------------------------------------------------------------------------|-----------------------------------------------------------------------------------------------------------|
| Self-criticalness           |    | Self-criticalness item in PS FMS: "I have been very self-critical" which was deleted after                                                                                                                                                              | First added to align with Fried (2017)<br><br>Was deleted because it resembled "Self-worth issues" too much | Added during: literature review between ES FMS and PS FMS (Fried, 2017)<br><br>Deleted during pilot study |
| Perceived social rejection  | 58 |                                                                                                                                                                                                                                                         | To align with Fried (2017)                                                                                  | Added during: literature review between ES FMS and PS FMS (Fried, 2017)                                   |
| Perceived life failure      | 59 |                                                                                                                                                                                                                                                         | To align with Fried (2017)                                                                                  | Added during: literature review between ES FMS and PS FMS (Fried, 2017; Radloff, 1977)                    |
| Mood swings                 | 60 |                                                                                                                                                                                                                                                         | Depressive symptom (Bowen et al., 2011)                                                                     | Added during: literature review between ES FMS and PS FMS (Bowen et al., 2011)                            |
| Excessive effort perception | 61 |                                                                                                                                                                                                                                                         | To align with Fried (2017)                                                                                  | Added during: literature review between ES FMS and PS FMS (Fried, 2017)                                   |
| Tinnitus                    | 62 | Initially added before PS FMS as: "I have had unpleasant sensations in my ear that did not originate from the environment (hissing, buzzing, ringing; tinnitus)" was changed to : "I have had ear noises such as: Hissing, buzzing, ringing (tinnitus)" | Was mentioned as missing during the ES FMS<br><br>Change was made for better wording                        | Added because of ES FMS                                                                                   |

|                   |    |                                                                                                                           |                                                                                                                                                                                                                             |                                                                                               |
|-------------------|----|---------------------------------------------------------------------------------------------------------------------------|-----------------------------------------------------------------------------------------------------------------------------------------------------------------------------------------------------------------------------|-----------------------------------------------------------------------------------------------|
| Inner turmoil     |    | Initially added before PS FMS as: "I have felt an inner turmoil"                                                          | Added because of a recommendation during the ES FMS to differentiate between inner and physical unrest                                                                                                                      | Added because of ES FMS                                                                       |
|                   |    | Deleted later                                                                                                             | Deleted after a remark during the pilot study saying that items 17,18 and 19 were too alike                                                                                                                                 | Deleted during pilot study                                                                    |
| Diurnal variation |    | Initially added before PS FMS as: "There has been a clear and predictable connection between the time of day and my mood" | Added to align with Fried (2017)                                                                                                                                                                                            | Added during: literature review between ES FMS and PS FMS (Fried, 2017)                       |
|                   |    | Deleted later                                                                                                             | Deleted to prevent confusion regarding different time frames of the item and the interview                                                                                                                                  | Deleted during pilot study                                                                    |
| Depersonalization | 63 |                                                                                                                           | "panic attack" was mentioned repeatedly in PS FMS                                                                                                                                                                           | Added because of PS FMS                                                                       |
|                   |    |                                                                                                                           | As it was decided to avoid the term "panic attack" in favor of an indirect way to ask for the construct (Moosbrugger & Brandt, 2020), "depersonalization" as symptom of a panic attack was added (Beesdo-Baum et al., 2019) | Further literature review after PS FMS (Beesdo-Baum et al., 2019; Moosbrugger & Brandt, 2020) |
| Heavy limbs       | 64 |                                                                                                                           | To align with Fried (2017)                                                                                                                                                                                                  | Added during: literature review between ES FMS and PS FMS (Fried, 2017; Trivedi et al., 2004) |

|                                       |    |                                                                                                                                                                                                                                                                       |                                                                                                                                                           |                                                                                                      |
|---------------------------------------|----|-----------------------------------------------------------------------------------------------------------------------------------------------------------------------------------------------------------------------------------------------------------------------|-----------------------------------------------------------------------------------------------------------------------------------------------------------|------------------------------------------------------------------------------------------------------|
| Movement difficulties                 | 65 |                                                                                                                                                                                                                                                                       | To align with Fried (2017)                                                                                                                                | Added during: literature review between ES FMS and PS FMS (Fried, 2017)                              |
| Vision                                | 66 |                                                                                                                                                                                                                                                                       | “Blurred vision” was mentioned as missing during ES FMS                                                                                                   | Added because of ES FMS                                                                              |
| Paresthesia/ dysesthesia              | 67 | Initially added before PS FMS as:<br><br>“I have had the feeling that parts of my body were numb or tingling” was changed to: “I have had physical sensations such as: Numbness, tingling, burning or excessive sensitivity to pain all over the body or parts of it” | “Numbness or tingling in hands or feet” was mentioned as missing during ES FMS<br><br>Complemented by adding “excessive sensitivity to pain” after PS FMS | Added because of ES FMS<br><br>Complemented because of PS FMS                                        |
| Pessimism                             | 40 | Initially added before PS FMS as: “I have had a pessimistic regard concerning my future” combined with “feeling hopeless” to: “I have felt hopeless or had a pessimistic view of my future.”                                                                          | Initially added to align with Fried (2017)<br><br>Combined to one item with “feeling hopeless” to reduce number of items by combining items too alike     | Added during: literature review between ES FMS and PS FMS (Fried, 2017)<br><br>Combined after PS FMS |
| Gastrointestinal or swallowing issues | 68 |                                                                                                                                                                                                                                                                       | Symptom of FMS (Häuser et al., 2008)                                                                                                                      | Further literature review after PS FMS (Häuser et al., 2008)                                         |

|                                     |    |                                                                                                                                  |                                                                                                                                                                                                                                                                                              |                                                                                                                                                       |
|-------------------------------------|----|----------------------------------------------------------------------------------------------------------------------------------|----------------------------------------------------------------------------------------------------------------------------------------------------------------------------------------------------------------------------------------------------------------------------------------------|-------------------------------------------------------------------------------------------------------------------------------------------------------|
| Exceeding physical limits           | 69 |                                                                                                                                  | Was added because of the following remark during the ES FMS: “The rarer type of FMS patients with the attempt to negate the pain and with inappropriate endurance strategies or who are ignoring pain for a long time, going beyond their own physical limits, disregarding pain is missing” | Added because of ES FMS                                                                                                                               |
| Suppressed aggressions              | 70 | Initially added before PS FMS as:<br><br>“I have suppressed aggressions”, then changed to: “I have kept my anger/rage to myself” | “Suppressed aggressions” were mentioned as missing during ES FMS<br><br>Change was made for better wording                                                                                                                                                                                   | Added because of ES FMS                                                                                                                               |
| Emptiness                           | 71 | Initially added before PS FMS as:<br><br>“I have felt an inner void”, then changed to: “I have felt numb, jaded or empty inside” | To align with Fried (2017)<br><br>Further rephrasing to describe emotional numbness and dissociative experiences as a sub-component of “brain fog” (McWhirter et al., 2023)                                                                                                                  | Added during: literature review between ES FMS and PS FMS (Fried, 2017)<br><br>Changed during literature review after PS FMS (McWhirter et al., 2023) |
| Muscle tension or cramps            | 72 |                                                                                                                                  | Mentioned in PS FMS                                                                                                                                                                                                                                                                          | Added because of PS FMS                                                                                                                               |
| Dry mucous membranes or watery eyes | 73 |                                                                                                                                  | Mentioned in PS FMS                                                                                                                                                                                                                                                                          | Added because of PS FMS                                                                                                                               |



|                        |    |                                                                                                                                                                                                                                                                                       |                                                                                                                                                                                                                                                                                                                                                 |                                                                                                                                                     |
|------------------------|----|---------------------------------------------------------------------------------------------------------------------------------------------------------------------------------------------------------------------------------------------------------------------------------------|-------------------------------------------------------------------------------------------------------------------------------------------------------------------------------------------------------------------------------------------------------------------------------------------------------------------------------------------------|-----------------------------------------------------------------------------------------------------------------------------------------------------|
| Anxiety attacks        | 74 |                                                                                                                                                                                                                                                                                       | Mentioned in PS FMS                                                                                                                                                                                                                                                                                                                             | Added because of PS FMS                                                                                                                             |
| Bladder issues         | 75 | Initially added as: “I have had digestive problems or bladder issues”, then divided in “digestive problems” (item 26) and “I have had bladder issues (burning sensation, pain/cramps, frequent or nocturnal urinating)                                                                | Bladder issues were added after being mentioned in ES FMS<br><br>Item 26 was divided in two (Bladder issues became Item 75) to avoid items covering several constructs                                                                                                                                                                          | Added because of ES FMS<br><br>Changed after PS FMS                                                                                                 |
| Hypersomnia            | 76 | Initially added to item 23 as: “I have had sleep problems (e.g. difficulties falling or staying asleep, waking up too early) or I slept too much (e.g. during the day), then item 23 was divided<br><br>Item 76 became: “I have fallen asleep during the day or could not stay awake” | “...or I slept too much (e.g. during the day)” was added to initial item 23 (-> sleeping problems) to cover “hypersomnia”, a symptom occurring in MDD (Gräfe et al., 2004) as well as in fibromyalgia (Sarzi-Puttini et al., 2021)<br><br>Decision to divide Insomnia and Hypersomnia in two items because of further research (E. Fried, 2017) | Added to item 23 during further research after ES FMS (Gräfe et al., 2004; Sarzi-Puttini et al., 2021)<br><br>Divided after PS FMS (E. Fried, 2017) |
| Twitches               | 77 |                                                                                                                                                                                                                                                                                       | Symptom of FMS (Häuser et al., 2008)                                                                                                                                                                                                                                                                                                            | Further literature review after PS FMS (Häuser et al., 2008)                                                                                        |
| Sensitivity to weather | 78 |                                                                                                                                                                                                                                                                                       | Symptom of FMS (Häuser et al., 2008)                                                                                                                                                                                                                                                                                                            | Further literature review after PS FMS (Häuser et al., 2008)                                                                                        |

|                     |    |                                                                                                                                                                                                                                                    |                                                                                                                                                                                                                                                     |                                                                                                          |
|---------------------|----|----------------------------------------------------------------------------------------------------------------------------------------------------------------------------------------------------------------------------------------------------|-----------------------------------------------------------------------------------------------------------------------------------------------------------------------------------------------------------------------------------------------------|----------------------------------------------------------------------------------------------------------|
| Hot or cold flashes | 79 | Initially added to item 30 as: “I have had physical reactions such as: feeling my heart racing, shortness of breath, heavy sweating, hot or cold flashes”<br><br>Item 30 was then divided so that item 76 became: “I have had hot or cold flashes” | Initially added to item 30 to have more symptoms representing physical arousal<br><br>Then “Hot or cold flashes” became a single item as it was concluded during an internal discussion that there could be other reasons for them (e.g. menopause) | Added to item 30 before PS FMS<br><br>Became single item after PS FMS and internal discussion            |
| Tremor              | 80 |                                                                                                                                                                                                                                                    | Symptom of FMS (Häuser et al., 2008)                                                                                                                                                                                                                | Further literature review after PS FMS (Häuser et al., 2008)                                             |
| Hair loss           | 81 |                                                                                                                                                                                                                                                    | Symptom of FMS (Häuser et al., 2008)                                                                                                                                                                                                                | Further literature review after PS FMS (Häuser et al., 2008)                                             |
| Cough               | 82 |                                                                                                                                                                                                                                                    | Symptom of FMS (Häuser et al., 2008)                                                                                                                                                                                                                | Further literature review after PS FMS (Häuser et al., 2008)                                             |
| Changes in appetite | 83 |                                                                                                                                                                                                                                                    | “Cravings” were mentioned in PS FMS, changes in appetite added as symptom of MDD (Beesdo-Baum et al., 2019)                                                                                                                                         | “Cravings” added because of PS FMS<br><br>Complemented after further research (Beesdo-Baum et al., 2019) |
| Burden to others    | 84 |                                                                                                                                                                                                                                                    | /                                                                                                                                                                                                                                                   | Added after PS because of internal discussion                                                            |
| Self-neglect        | 85 |                                                                                                                                                                                                                                                    | Mentioned during PS MDD                                                                                                                                                                                                                             | Added because of PS MDD                                                                                  |
| Ashamed             | 86 |                                                                                                                                                                                                                                                    | Mentioned during ES MDD                                                                                                                                                                                                                             | Added because of ES MDD                                                                                  |

|                                        |    |                                                                                                                                                                                    |                                                                                                                                                                                                                                                     |                                                                                                                       |
|----------------------------------------|----|------------------------------------------------------------------------------------------------------------------------------------------------------------------------------------|-----------------------------------------------------------------------------------------------------------------------------------------------------------------------------------------------------------------------------------------------------|-----------------------------------------------------------------------------------------------------------------------|
| Nightmares                             | 87 | Initially added before PS FMS as: "I have had nightmares which reminded me of a traumatic event in my past", deleted in the meantime, eventually added as: "I have had nightmares" | Initially added because of literature review<br><br>Deleted in the meantime to avoid confounding by post-traumatic stress disorder (PTSD)<br><br>Eventually added without the link to a traumatic event because nightmares were mentioned in PS MDD | Added during: literature review between ES FMS and PS FMS<br><br>Deleted in the meantime<br><br>Re-added after PS MDD |
| Incontinence                           | 88 |                                                                                                                                                                                    | Mentioned during PS MDD                                                                                                                                                                                                                             | Added because of PS MDD                                                                                               |
| Hallucinations                         | 89 |                                                                                                                                                                                    | Mentioned during ES MDD                                                                                                                                                                                                                             | Added because of ES MDD                                                                                               |
| Gambling                               | 90 |                                                                                                                                                                                    | Mentioned during PS MDD                                                                                                                                                                                                                             | Added because of PS MDD                                                                                               |
| Computer games/social media            | 91 |                                                                                                                                                                                    | Mentioned during PS MDD                                                                                                                                                                                                                             | Added because of PS MDD                                                                                               |
| Feeling paralyzed                      | 92 |                                                                                                                                                                                    | Symptom of dissociation                                                                                                                                                                                                                             | Further research after PS and ES MDD                                                                                  |
| Just functioning                       | 93 |                                                                                                                                                                                    | Mentioned during PS MDD                                                                                                                                                                                                                             | Added because of PS MDD                                                                                               |
| Unwanted memories of a traumatic event |    | Initially added before PS FMS as: "Unwanted memories of a traumatic event haunted me out of the sudden"<br><br>Deleted afterwards                                                  | Initially added because of literature review (Frewen et al., 2013)<br><br>Deleted afterwards to avoid confounding by PTSD                                                                                                                           | Added during: literature review between ES FMS and PS FMS (Frewen et al., 2013)<br><br>Deleted after                  |

|                                    |                                                                                                                                   |                                                                    |                                                                                 |
|------------------------------------|-----------------------------------------------------------------------------------------------------------------------------------|--------------------------------------------------------------------|---------------------------------------------------------------------------------|
| Flashbacks                         | Initially added before PS FMS as: "I have felt as though I was re-living a traumatic event from my past (so-called 'flashbacks')" | Initially added because of literature review (Frewen et al., 2013) | Added during: literature review between ES FMS and PS FMS (Frewen et al., 2013) |
|                                    | Deleted afterwards                                                                                                                | Deleted afterwards to avoid confounding by PTSD                    | Deleted after                                                                   |
| Trying to avoid traumatic memories | Initially added before PS FMS as: "I have tried to avoid traumatic memories (thoughts and sensations included)"                   | Initially added because of literature review (Frewen et al., 2013) | Added during: literature review between ES FMS and PS FMS (Frewen et al., 2013) |
|                                    | Deleted afterwards                                                                                                                | Deleted afterwards to avoid confounding by PTSD                    | Deleted after                                                                   |

---

*Table S3: The item development process for the symptom list used in the main study, including the changes made during the process and the reasons for them. PS: Patient Survey; ES: Expert Survey.*

## Section B: Used R Packages

**Following packages were used for the data analyse the data or to create and export the figures:**

*cocor* (Diedenhofen & Musch; 2015), *PECAN2* (Reichert & Vogel. 2024), *visNetwork* (Almende & Thieurmél), *rstatix* (Kassambara, 2023), *dplyr* (Wickham et al., 2023), *tidyr* (Wickham et al., 2024), *readxl* (Wickham & Bryan, 2023), *writexl* (Ooms, 2024), *table1* (Rich, 2023), *readr* (Wickham et al., 2024b), *compareGroups* (Subirana et al., 2024), *rempsyc* (Thériault, 2023), *stringr* (Wickham, 2023), *car* (Fox et al., 2012).

## **Section C: Definition of the final categories for qualitative differences of the edges**

### **Definitions of explanations for missing edges at T2**

- 1) “No explanation”: Participant does not know why the edge is missing.
- 2) “Causality is the other way around/ not clear”: Either the participant has noticed that symptom x does not influence symptom y, but vice versa, so that the originally assumed causality from t1 is missing OR the participant cannot say with certainty that symptom x causes symptom y and not vice versa.
- 3) “Forgot to mention the edge during the second interview”: The participant forgot to mention the perceived causal relation during the second interview.
- 4) “Symptoms are not related (mistake at T1)”: The subject noticed that the two symptoms forming the edge were not related at all, contrary to what was stated in the first interview.
- 5.) “One of the symptoms was perceived differently on the day of the interview”: The participant had perceived a symptom to be particularly strong on the day of the first interview and/ or hardly perceived it at all on the day of the second interview, so that the influence was assessed differently.
- 6.) “Symptom relation changed between the interviews”: The severity, occurrence, or frequency of one of the symptoms that form the edge has changed between interviews, and thus its associated perceived causal relations.
- 7) “Symptoms were hard to differentiate”: The participant struggles to understand what the item really means, or to separate it from other experienced symptoms.

### **Definitions of explanations for newly edges at T2**

- 1) “No explanation”: Participant does not know why the edge is new.
- 2) “New insight”: Through a process of reflection between interviews or during the second interview, the participant realized that there was a causal relationship between the two symptoms.
- 3) “Forgot to mention the edge during the first interview”: The participant forgot to mention the perceived causal relation during the first interview.
- 4) “Symptoms are not related (mistake at T2)”: The perceived causal relationship is false because the participant made a mistake in selecting it in the second interview.
- 5) “One of the symptoms was perceived differently at the day of the interview”: The participant had perceived a symptom to be particularly strong on the day of the second interview and/ or hardly perceived it at all on the day of the first interview, so that the influence was assessed differently.
- 6) “Symptom relation changed between the interviews”: The severity, occurrence, or frequency of one of the symptoms that form the edge has changed between interviews, and thus its associated perceived causal relations.
- 7) Symptoms were hard to differentiate: The participant struggles to understand what the item really means, or to separate it from other experienced symptoms.
- 8) “Causality is not clear/ the other way around”: Either the participant has noticed that symptom x does not influence symptom y, but vice versa, so that the causality is now stated at the second interview OR the participant cannot say with certainty that symptom x causes symptom y and not vice versa.

**Table S4: Participant ratings of network usability and comprehensibility**

|                                                                                                                                                                     | <b>FMS<br/>(N=50)</b> | <b>MDD<br/>(N=50)</b> | <b>Overall<br/>(N=100)</b> |
|---------------------------------------------------------------------------------------------------------------------------------------------------------------------|-----------------------|-----------------------|----------------------------|
| <b>Usability ratings</b>                                                                                                                                            |                       |                       |                            |
| “I think the networks are absolutely useful”.                                                                                                                       | 4.00 (.83)            | 4.16 (.73)            | 4.08 (.79)                 |
| “I think I will use the networks”.                                                                                                                                  | 3.53 (1.20)           | 3.70 (.91)            | 3.62<br>(1.06)             |
| “I think I can use the networks to make changes on my own to improve my mental health.”                                                                             | 3.32 (1.14)           | 3.40 (.93)            | 3.36<br>(1.03)             |
| “The visual representation of the results in the form of a network has helped me to gain a better understanding of my complaints and the connections between them.” | 3.51 (1)              | 3.88 (1)              | 3.70<br>(1.01)             |
| “The visual representation of the results in the form of a network is useful”                                                                                       | 3.83 (.76)            | 4.18 (0.77)           | 4.01 (.78)                 |
| <b>Comprehensibility ratings</b>                                                                                                                                    |                       |                       |                            |
| “I can use the networks without having to learn anything new.”                                                                                                      | 3.40 (0.88)           | 3.70 (1.05)           | 3.56 (.98)                 |
| “I found looking at the networks stressful.”                                                                                                                        | 2.49 (1.06)           | 2.22 (.91)            | 2.35 (.99)                 |
| “I found the networks easy to understand.”                                                                                                                          | 3.72 (.90)            | 3.82 (.98)            | .77 (.94)                  |
| “I think I can understand the networks without the support of another person.”                                                                                      | 3.53 (1.08)           | 3.68 (1.08)           | 3.61<br>(1.08)             |

|                                                                                    |            |                 |            |
|------------------------------------------------------------------------------------|------------|-----------------|------------|
| “I found the networks intuitive.”                                                  | 3.36 (.74) | 3.88 (.9)       | 3.63 (.86) |
| “I felt confident in interpreting the networks.”                                   | 3.87 (.71) | 4.02<br>(0.958) | 3.95 (.85) |
| “I can imagine that most people learn to understand the<br>networks very quickly.” | 3.36 (.82) | 4.00 (.7)       | 3.69 (.82) |

---

*Table S4: Mean participant ratings and standard deviations of network usability and comprehensibility, overall and stratified by group. Items were rated on a five-point Likert scale from 1 ("disagree") to 5 ("strongly agree").*



**Table S5: Average participant evaluation of the unedited and the edited network.**

|                                                                                                                                 | <b>edit<br/>(N=20)</b> | <b>unedit<br/>(N=98)</b> |
|---------------------------------------------------------------------------------------------------------------------------------|------------------------|--------------------------|
| “The network shows how my complaints are interrelated”,<br>Mean (SD)                                                            | 4.25 (0.72)            | 4.10 (.79)               |
| “The network helps me to better understand my<br>complaints.”, Mean (SD)                                                        | 3.80 (.95)             | 3.55 (.95)               |
| “The network could help me to talk about my symptoms<br>at the start of therapy”, Mean (SD)                                     | 3.95 (1.05)            | 3.76 (1.03)              |
| “The network shows me what I need to change in order<br>to feel better.”, Mean (SD)                                             | 3.30 (1.13)            | 3.01 (.99)               |
| “The network helps me to understand what I can expect<br>if I change something.”, Mean (SD)                                     | 3.25 (1.21)            | 3.19 (.92)               |
| “Engaging with the network motivates me to change<br>something.”, Mean (SD)                                                     | 3.30 (1.26)            | 3.16 (1.06)              |
| “Providing the results of this network will help my<br>therapist to better understand and work on my<br>complaints.”, Mean (SD) | 3.80 (1.01)            | 3.56 (1.01)              |
| “The network reflects my complaints well.”, Mean (SD)                                                                           | 4.05 (.76)             | 3.83 (.87)               |
| “I am happy with the way the network is presented.”                                                                             | 4.05 (1)               | 3.90 (.94)               |

*Table S5: Mean participant ratings and standard deviations of participants evaluation of the unedited and the edited network. Items were rated on a five-point Likert scale from 1 ("disagree") to 5 ("strongly agree").*

#### **Section D: Statements about which connections became clearer to participants**

“That one symptom is the focus for me and many things are connected to it; some connections were surprising”; “It was interesting to see how everything is connected and that there are connections at all.”; “I now know what triggers my sleep problems and can work on those triggers”; “By consciously thinking about the connections, I noticed connections that I had not seen before.”; “The study made me realize how much my two main symptoms, loneliness and despair, affect the other symptoms.”; “Differentiation: What is the actual problem and what is just a by-product?”; “For example, the extent to which aimless "avoidance rumination" fosters useless worry, frustration, and procrastination.”; “More connections”; “The interview made me think about observing how symptoms affect each other, and if I try to relieve one symptom, do other symptoms improve?”; “I have at least realized THAT there are connections. How some influence each other and make each other stronger. I found that incredibly exciting.”; “These were not necessarily so clear to me before”; “Symptom cascades or core symptoms that can directly cause other symptoms”; “The dependence of some symptoms on others.”; “For me, one realization was that nervousness acts as one of the connecting symptoms, which is linked to a surprising number of symptoms”; “I have realized that lack of drive is at the heart of my illness, so I need to focus on life energy and purpose. Difficulty making decisions (along with lack of drive) also seems to have a chain of negative consequences. Many of the problems lead to online activity, often as a distraction. I was surprised that the feeling of being "alone" actually stands alone.”; “In the feedback I realized once again and schematically what my main trigger is and how everything is connected”; “I was aware of the major influence of sleep problems -> vicious circle. The interview made me more aware that depersonalization and inner emptiness also exacerbate some symptoms such as lack of concentration and lack of exercise and that there is a vicious circle here too.”; “Especially that they are actually two separate networks and not one and how mistrust, loneliness and suicidal tendencies are connected.”; “Connection between tension, attention to it, previous overload, not standing up for myself enough and rest breaks.”; “It is noticeable that the lack of sleep, i.e. little sleep, apparently intensifies the complaints during the day.”; “when the interviewer gave individual examples of possible connections.”; “Certain symptoms have a greater influence on my well-being”; “I have tried to avoid certain patterns of thinking or acting that could lead to a worsening of my condition.”; “How the symptoms are related”; “Strong correlations between various Symptoms, knotted system/feelings”; “A little more "structure" recognizable and easier to classify.”; “It's all a chain reaction.”; “I had not previously associated my frequent use of the toilet with this illness.”; “Whether stress increases pain”; “Tiredness/exhaustion due to indigestion/pain and worries”; “Poor sleep has a major impact on various complaints”; “That the pain does have a greater impact on the whole body”; “Where the depression mood swings come from”; “Visualizing the individual connections helps me to think and make decisions”; “I thought more about the connections and it was very clear”; “The interlocking of symptoms”; “I think the connections were already clear, but they are now easier to understand”; “Actually, knowledge about my illness was refreshed in order to deal with it more again”; “I realized that stress has a big influence on my complaints.”; “The perspective on what happened can give rise to different views.”; “That stress and irritation affect the pain”; “I have noticed that the more problems I have, the more physical problems I get”; “So far, I have dealt less with the different interactions. You try something, e.g. nutrition, and it either does you good or it doesn't”; “I have never consciously thought about it. You observe this through the questions.”

## **Section E: Statements on which other positive of negative interview effects**

“It helped me to understand why I feel the way I do. It helped me sort through my thoughts.”; “It was stressful at times, but it also led to a bit more clarity in other ways.”; “I’m more careful not to take on too much and to say no sometimes.”; “I have actively tried to increase my well-being by alleviating individual symptoms - as far as possible for me.”; “I definitely want to continue researching whether and how I have an influence and whether this knowledge will now perhaps even enable me to “attenuate” certain fears.”; “After that, greater exhaustion/tiredness”; “Yes, I was able to organize my thoughts more”; “Immediately after the first interview (about an hour long), I was a bit down and thought more about the depressive phases of the past.”; “Positive in so far as someone else has heard my concerns again.”; “It has enabled a different level of self-reflection.”; “Visualization of the inner state/reflection.”; “More clarity regarding the symptoms and their contexts. Also to see which symptoms become clearer in a good phase and which become clearer or more burdensome in a worse phase.”; “It exhausted me.”; “I am glad that such studies are being done at all and hope that they will have an impact on future diagnostics and treatments. My impression is that the topic should be approached in a much more interdisciplinary way; there is still far too little coordination between treating physicians.”; “It makes you more aware that you are not alone.”; “More rest and breaks”; “It made me realize once again... Giving up is not an option, even when the pain is mostly unbearable.”; “Many things went through my head that I had suppressed.”; “I will think about how I can positively influence certain symptoms through others.”; “I am able to better understand the disease.”; “I am taking myself more seriously again and sharing this with those around me, especially my family.”; “Better understanding”; “It is always good to deal with your complaints. Although it is very exhausting, it is also stimulating to reflect on them.”; “As I said, I see everything in a more differentiated way and observe more what happens to my body and my mind when I have more stress or get less sleep than usual, etc., and I then see the influence in my perception.”; “Better understanding between pain and trigger”; “You think about a lot of things!!!!”; “The visualization helped me a lot to sort the different complaints”; “To reflect on it more consciously. It was definitely very interesting to visualize the connections in this way.”; Dealing with it made me feel worse mentally. I usually try to deal with my pain as little as possible and distract myself, unless the pain is so severe that it isn't possible. The intense engagement with it made me feel worse overall.”.

## Reference List Supplementary Online Resource

Almende B.V. and Contributors, Thieurmel B (2025). *visNetwork: Network Visualization using 'vis.js' Library*. R package version 2.1.3, <https://github.com/datastorm-open/visnetwork>.

Beesdo-Baum, K., Zaudig, M., & Wittchen, H.-U. (Hrsg.). (2019). SCID-5-CV : strukturiertes klinisches Interview für DSM-5-Störungen—Klinische Version: Deutsche Bearbeitung des Structured Clinical Interview for DSM-5 Disorders—Clinician version von Michael B. First, Janet B.W. Williams, Rhonda S. Karg, Robert L. Spitzer (1. Auflage). Hogrefe Verlag.

Berner, M.M., Kriston, L., Zahradnik, H.-P., Härter, M., & Rohde, A. (2004). Überprüfung der Gültigkeit und Zuverlässigkeit des deutschen Female Sexual Function Index (FSFI-d). *Geburtshilfe und Frauenheilkunde*, 64(3), 293–303. <https://doi.org/10.1055/s-2004-815815>

Besiroglu, M. D. H., & Dursun, M. D. M. (2019). The association between fibromyalgia and female sexual dysfunction: A systematic review and meta-analysis of observational studies. *International Journal of Impotence Research*, 31(4), 288–297. <https://doi.org/10.1038/s41443-018-0098-3>

Bowen, R. C., Mahmood, J., Milani, A., & Baetz, M. (2011). Treatment for depression and change in mood instability. *Journal of Affective Disorders*, 128(1–2), 171–174. <https://doi.org/10.1016/j.jad.2010.06.040>

Chakrabarty, S., & Zoorob, R. (2007). Fibromyalgia. *American Family Physician*, 76(2), 247–254.

Clauw, D. J. (2009). Fibromyalgia: An Overview. *The American Journal of Medicine*, 122(12), S3–S13. <https://doi.org/10.1016/j.amjmed.2009.09.006>

Diedenhofen B, Musch J (2015). “cocor: A Comprehensive Solution for the Statistical Comparison of Correlations.” *PLoS ONE*, 10(4), e0121945. [doi:10.1371/journal.pone.0121945](https://doi.org/10.1371/journal.pone.0121945), <http://dx.doi.org/10.1371/journal.pone.0121945>.

Dilling, H., Mombour, W., Schmidt, M. H., Schulte-Markwort, E., Remschmidt, H., & Weltgesundheitsorganisation (Hrsg.). (2015). Internationale Klassifikation psychischer Störungen: ICD-10 Kapitel V (F) klinisch-diagnostische Leitlinien (10. Auflage, unter Berücksichtigung der Änderungen entsprechend ICD-10-GM 2015). Hogrefe Verlag.

Frewen, P. A., Schmittmann, V. D., Bringmann, L. F., & Borsboom, D. (2013). Perceived causal relations between anxiety, posttraumatic stress and depression: Extension to moderation, mediation, and network analysis. *European Journal of Psychotraumatology*, 4(1), 20656. <https://doi.org/10.3402/ejpt.v4i0.20656>

Fried, E. (2017). Moving forward: How depression heterogeneity hinders progress in treatment and research. *Expert Review of Neurotherapeutics*, 17(5), 423–425. <https://doi.org/10.1080/14737175.2017.1307737>

Fried, E. I. (2017). The 52 symptoms of major depression: Lack of content overlap among seven common depression scales. *Journal of Affective Disorders*, 208, 191–197. <https://doi.org/10.1016/j.jad.2016.10.019>

Fox, J., Weisberg, S., Adler, D., Bates, D., Baud-Bovy, G., Ellison, S., ... & Heiberger, R. (2012). Package ‘car’. Vienna: R Foundation for Statistical Computing, 16(332), 333.

Galvez-Sánchez, C. M., Duschek, S., & Reyes Del Paso, G. A. (2019). Psychological impact of fibromyalgia: Current perspectives. *Psychology Research and Behavior Management*, Volume 12, 117–127. <https://doi.org/10.2147/PRBM.S178240>

- Gierk, B., Kohlmann, S., Kroenke, K., Spangenberg, L., Zenger, M., Brähler, E., & Löwe, B. (2014). The Somatic Symptom Scale–8 (SSS-8): A Brief Measure of Somatic Symptom Burden. *JAMA Internal Medicine*, 174(3), 399–407. <https://doi.org/10.1001/jamainternmed.2013.12179>
- Gräfe, K., Zipfel, S., Herzog, W., & Löwe, B. (2004). Screening psychischer Störungen mit dem “Gesundheitsfragebogen für Patienten (PHQ-D)“. *Diagnostica*, 50(4), 171–181. <https://doi.org/10.1026/0012-1924.50.4.171>
- Häuser, W., Zimmer, C., Felde, E., & Köllner, V. (2008). Was sind die Kernsymptome des Fibromyalgiesyndroms?: Umfrageergebnisse der Deutschen Fibromyalgievereinigung. *Der Schmerz*, 22(2), 176–183. <https://doi.org/10.1007/s00482-007-0602-z>
- Harris, P.A., Taylor, R., Thielke, R., Payne, J., Gonzalez, N., & Conde, J.G. (2009) Research electronic data capture (REDCap) – A metadata-driven methodology and workflow process for providing translational research informatics support. *Journal of biomedical Informatics*, 42(2), 377–381. <https://doi.org/10.1016/j.jbi.2008.08.010>
- Hasenbring, M. I., & Verbunt, J. A. (2010). Fear-avoidance and Endurance-related Responses to Pain: New Models of Behavior and Their Consequences for Clinical Practice. *The Clinical Journal of Pain*, 26(9), 747–753. <https://doi.org/10.1097/AJP.0b013e3181e104f2>
- Hinz, A., Klein, A. M., Brähler, E., Glaesmer, H., Luck, T., Riedel-Heller, S. G., Wirkner, K., & Hilbert, A. (2017). Psychometric evaluation of the Generalized Anxiety Disorder Screener GAD-7, based on a large German general population sample. *Journal of Affective Disorders*, 210, 338–344. <https://doi.org/10.1016/j.jad.2016.12.012>
- Kassambara A (2023). rstatix: Pipe-Friendly Framework for Basic Statistical Tests. R package version 0.7.2, <https://rpkgs.datanovia.com/rstatix/>.
- Klintwall, L., Bellander, M., & Cervin, M. (2023). Perceived Causal Problem Networks: Reliability, Central Problems, and Clinical Utility for Depression. *Assessment*, 30(1), 73–83. <https://doi.org/10.1177/10731911211039281>
- Krasselt, M., & Baerwald, C. (2018). Fibromyalgie-Syndrom: Aktuelle Empfehlungen zu Diagnostik und Therapie. *DMW - Deutsche Medizinische Wochenschrift*, 143(15), 1103–1108. <https://doi.org/10.1055/a-0542-9531>
- Kravitz, H. M., & Katz, R. S. (2015). Fibrofog and fibromyalgia: A narrative review and implications for clinical practice. *Rheumatology International*, 35(7), 1115–1125. <https://doi.org/10.1007/s00296-014-3208-7>
- McCracken, L. M., & Dhingra, L. (2002). A Short Version of the Pain Anxiety Symptoms Scale (PASS-20): Preliminary Development and Validity. *Pain Research and Management*, 7(1), 45–50. <https://doi.org/10.1155/2002/517163>
- McWhirter, L., Smyth, H., Hoeritzauer, I., Couturier, A., Stone, J., & Carson, A. J. (2023). What is brain fog? *Journal of Neurology, Neurosurgery & Psychiatry*, 94(4), 321–325. <https://doi.org/10.1136/jnnp-2022-329683>
- Meyer, K., Sprott, H., & Mannion, A. F. (2008). Cross-cultural adaptation, reliability, and validity of the German version of the Pain Catastrophizing Scale. *Journal of Psychosomatic Research*, 64(5), 469–478. <https://doi.org/10.1016/j.jpsychores.2007.12.004>
- Moosbrugger, H., & Brandt, H. (2020). Itemkonstruktion und Antwortverhalten. In H. Moosbrugger & A. Kelava (Hrsg.), *Testtheorie und Fragebogenkonstruktion* (S. 67–89). Springer. [https://doi.org/10.1007/978-3-662-61532-4\\_4](https://doi.org/10.1007/978-3-662-61532-4_4)

- Ooms J (2024). writexl: Export Data Frames to Excel 'xlsx' Format. R package version 1.5.1 <https://ropensci.r-universe.dev/writexl> <https://docs.ropensci.org/writexl/>, <https://ropensci.r-universe.dev/writexl> <https://docs.ropensci.org/writexl/>.
- Palomino, R. A., Nicassio, P. M., Greenberg, M. A., & Medina, E. P. (2007). Helplessness and loss as mediators between pain and depressive symptoms in fibromyalgia. *Pain*, 129(1), 185–194. <https://doi.org/10.1016/j.pain.2006.12.026>
- Radloff, L. S. (1977). The CES-D Scale: A Self-Report Depression Scale for Research in the General Population. *Applied Psychological Measurement*, 1(3), 385–401. <https://doi.org/10.1177/014662167700100306>
- Reichert, J. & Vogel, F. (2024). PECAN2 [R]. <https://github.com/JR-psych/PECAN2>
- Rich B. (2023). table1: Tables of Descriptive Statistics in HTML. R package version 1.4.3, <https://CRAN.R-project.org/package=table1>
- Sarzi-Puttini, P., Giorgi, V., Atzeni, F., Gorla, R., Kosek, E., Choy, E. H., Bazzichi, L., Häuser, W., Ablin, J. N., Aloush, V., Buskila, D., Amital, H., Da Silva, J. A. P., Perrot, S., Morlion, B., Polati, E., Schweiger, V., Coaccioli, S., Varrassi, G., ... Batticciotto, A. (2021). Fibromyalgia position paper. *Clinical and Experimental Rheumatology*, 39(3), 186–193. <https://doi.org/10.55563/clinexprheumatol/i19pig>
- SoSci Survey GmbH. <https://www.soscisurvey.de/de/index> (2020, November 13). SoSciSurvey.
- Spitzer, R. L., Kroenke, K., Williams, J. B. W., & Löwe, B. (2006). A Brief Measure for Assessing Generalized Anxiety Disorder: The GAD-7. *Archives of Internal Medicine*, 166(10), 1092–1097. <https://doi.org/10.1001/archinte.166.10.1092>
- Subirana I, Sanz H, Vila J (2014). “Building Bivariate Tables: The compareGroups Package for R.” *Journal of Statistical Software*, 57(12), 1–16. <https://www.jstatsoft.org/v57/i12/>.
- Sullivan, M. J. L., Bishop, S. R., & Pivik, J. (1995). The Pain Catastrophizing Scale: Development and validation. *Psychological Assessment*, 7(4), 524–532. <https://doi.org/10.1037/1040-3590.7.4.524>
- Thériault R (2023). “rempsyc: Convenience functions for psychology.” *Journal of Open Source Software*, 8(87), 5466. [doi:10.21105/joss.05466](https://doi.org/10.21105/joss.05466), <https://doi.org/10.21105/joss.05466>.
- Trivedi, M. H., Rush, A. J., Ibrahim, H. M., Carmody, T. J., Biggs, M. M., Suppes, T., Crismon, M. L., Shores-Wilson, K., Toprac, M. G., Dennehy, E. B., Witte, B., & Kashner, T. M. (2004). The Inventory of Depressive Symptomatology, Clinician Rating (IDS-C) and Self-Report (IDS-SR), and the Quick Inventory of Depressive Symptomatology, Clinician Rating (QIDS-C) and Self-Report (QIDS-SR) in public sector patients with mood disorders: A psychometric evaluation. *Psychological Medicine*, 34(1), 73–82. <https://doi.org/10.1017/S0033291703001107>
- Ware, J. E., Kosinski, M., & Keller, S. D. (1996). A 12-Item Short-Form Health Survey: Construction of Scales and Preliminary Tests of Reliability and Validity. *Medical Care*, 34(3), 220–233. <https://doi.org/10.1097/00005650-199603000-00003>
- Wickham H (2023). stringr: Simple, Consistent Wrappers for Common String Operations. R package version 1.5.1, <https://github.com/tidyverse/stringr>, <https://stringr.tidyverse.org>.
- Wickham H, Bryan J (2023). readxl: Read Excel Files. <https://readxl.tidyverse.org>, <https://github.com/tidyverse/readxl>.

Wickham H, François R, Henry L, Müller K, Vaughan D (2023). dplyr: A Grammar of Data Manipulation. R package version 1.1.4, <https://github.com/tidyverse/dplyr>, <https://dplyr.tidyverse.org>

Wickham H, Hester J, Bryan J (2024b). readr: Read Rectangular Text Data. R package version 2.1.5, <https://github.com/tidyverse/readr>, <https://readr.tidyverse.org>.

Wickham H, Vaughan D, Girlich M (2024). tidyr: Tidy Messy Data. R package version 1.3.1, <https://github.com/tidyverse/tidyr>, <https://tidyr.tidyverse.org>

Wicksell, R. K., Lekander, M., Sorjonen, K., & Olsson, G. L. (2010). The Psychological Inflexibility in Pain Scale (PIPS) – Statistical properties and model fit of an instrument to assess change processes in pain related disability. *European Journal of Pain*, 14(7). <https://doi.org/10.1016/j.ejpain.2009.11.015>
